# Supplementary material
Source: bioRxiv or medRxiv preprint supplement (https://www.biorxiv.org/highwire/filestream/15371/field_highwire_adjunct_files/9/055921-6.pdf)
Supplement: Supplementary file [file 055921-6.pdf]

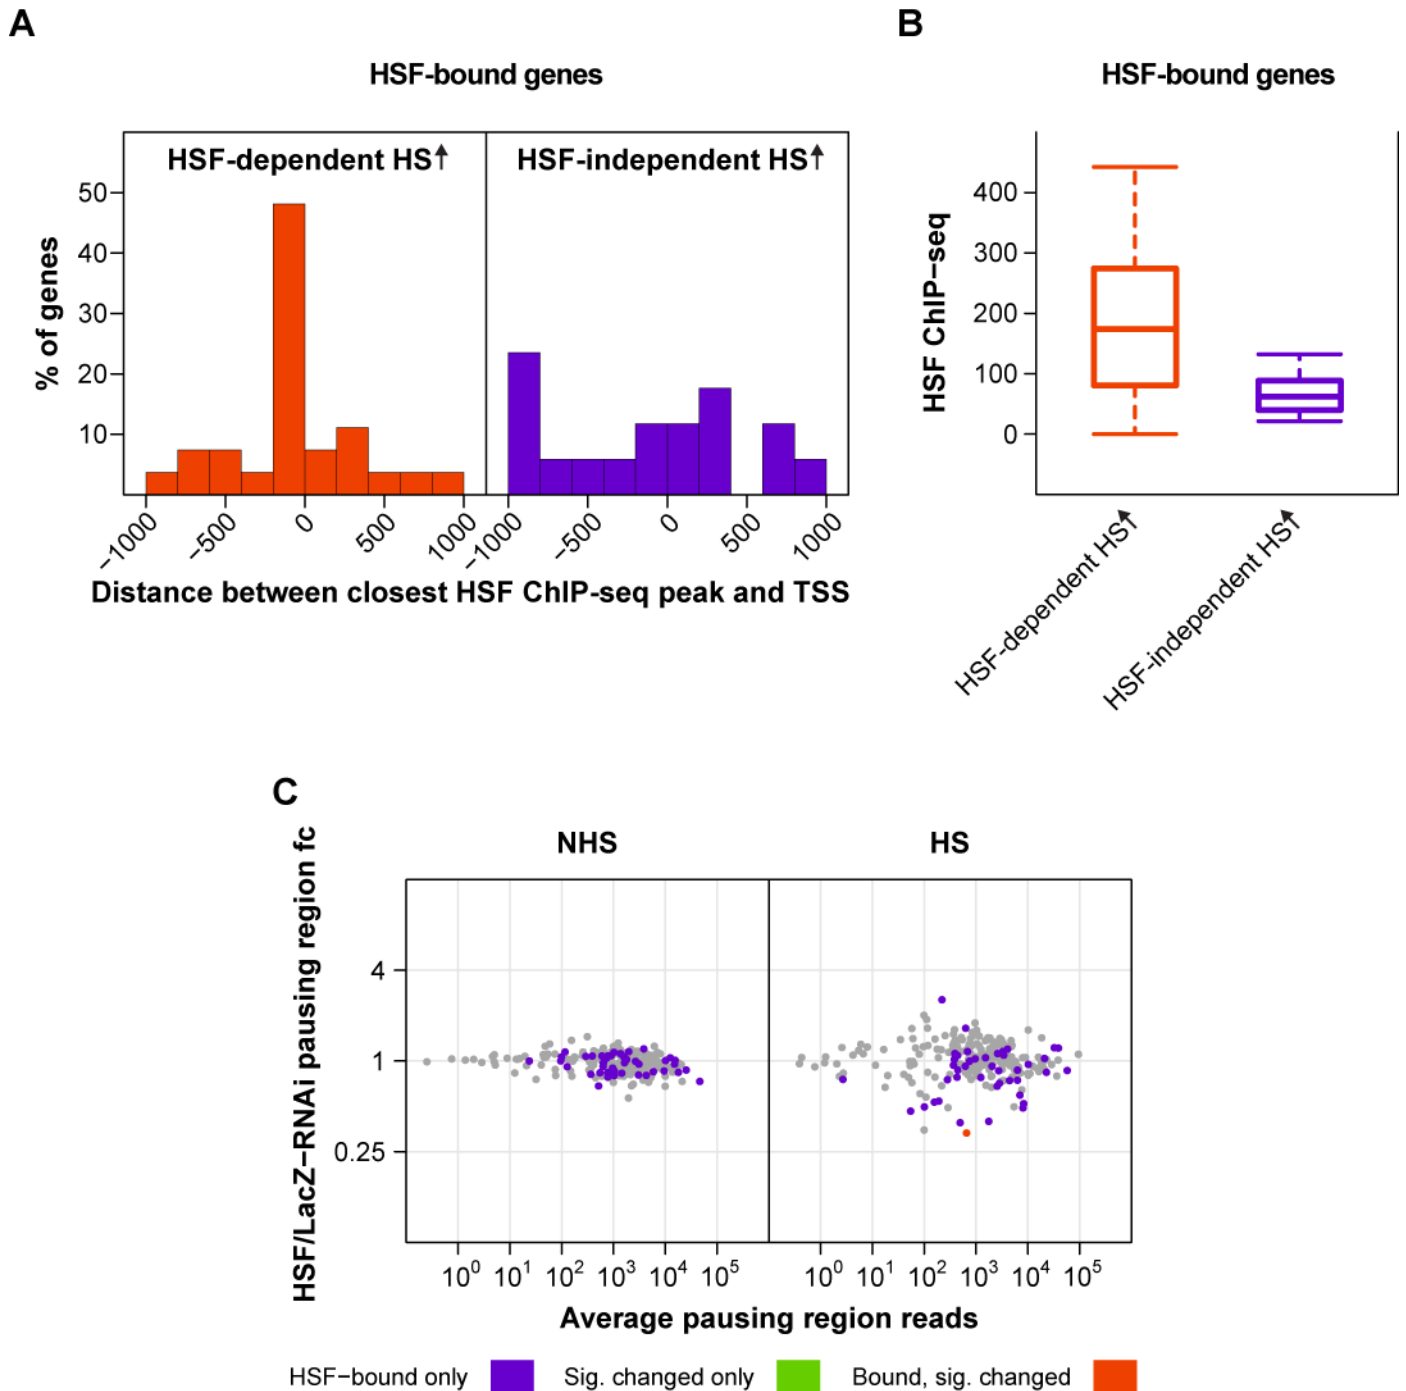

**Figure S6: Higher HSF binding levels and positioning upstream and proximal to the TSS are important for the induction of HSF's target genes. (A)** Histogram with the distribution of distances between the closest HSF ChIP-seq peak and the TSS of HSF-bound genes with HSF-dependent (left panel, n=27) or independent (right panel, n=17) HS activation. The distances are plotted in 200 bp bins from  $\pm 1000$  bp to the TSS. **(B)** Box-plot showing the distribution of HSF ChIP-seq binding intensities for the two classes of genes described in A. **(C)** DESeq2 analysis to determine the effect of HSF-RNAi treatment on the PRO-seq pausing region reads before (NHS) and after 20min HS (HS). DESeq2 was used to identify significantly changed genes between HSF-RNAi and LacZ-RNAi cells and the results are displayed as MA plots. Significantly changed genes were defined using an FDR of 0.001. HSF-bound genes are labeled in purple, significantly changed genes (according to DESeq2) are labeled in green and genes that are both HSF-bound and significantly changed are labeled in orange.
